# Supplementary material
Source: MDPI journal article supplement (https://www.mdpi.com/2073-4395/11/8/1469)
Supplement: s1 [file s1]

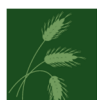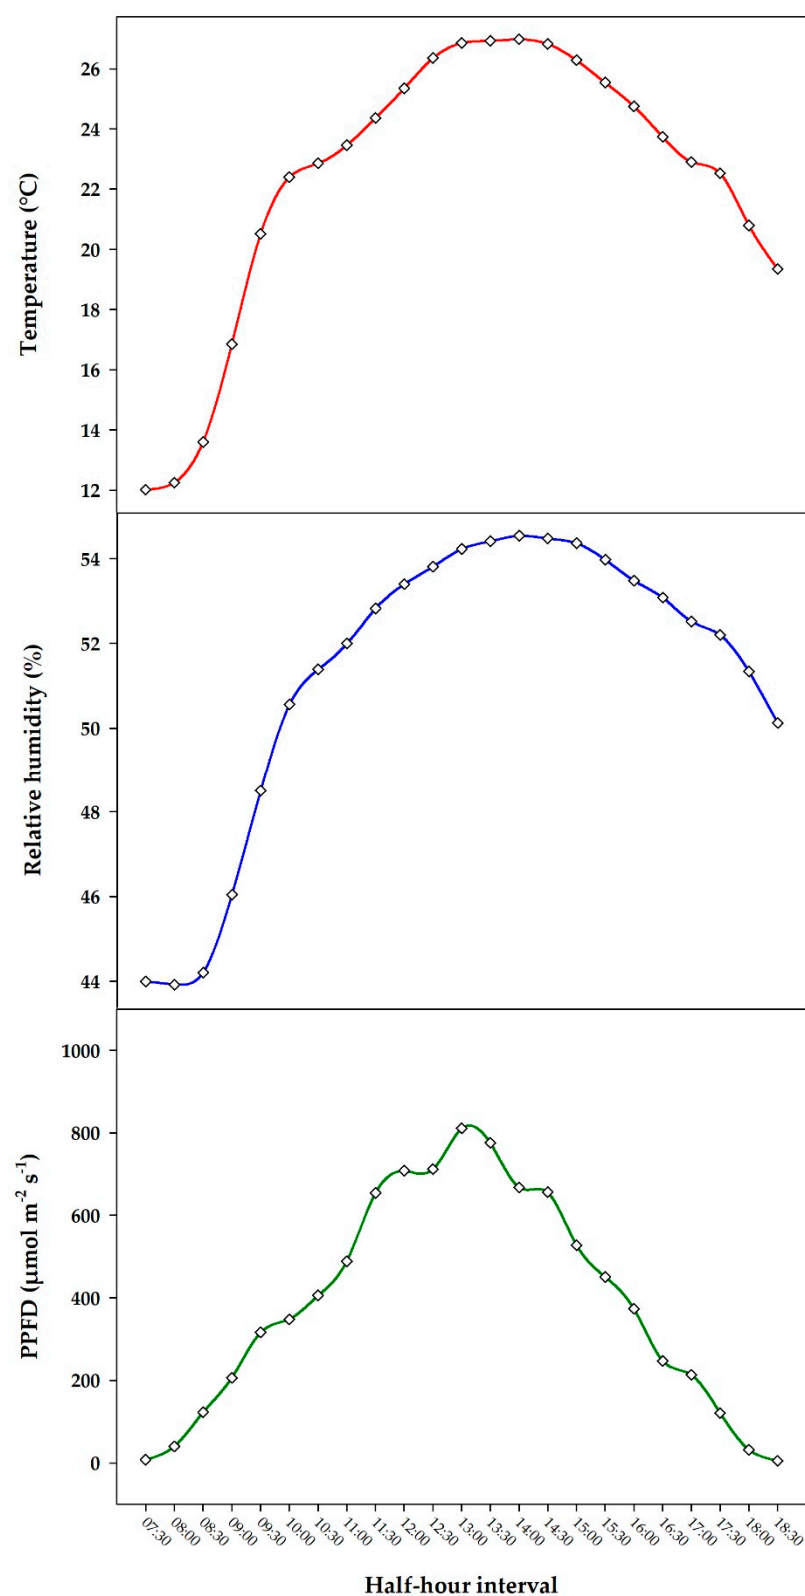

**Figure S1.** Average air temperature, air relative humidity Photosynthetic Photon Flux Density (PPFD) recorded during the growing season at the experimental site.
